# Supplementary material for: Molecular basis of canalization in an ascidian species complex adapted to different thermal conditions
Source: PubMed Central journal article supplement (PMC4649386; doi:10.1038/srep16717), 2015-11-18
Supplement: srep16717-s1.pdf [file srep16717-s1.pdf]

Supporting online material for:  
**Molecular basis of canalization in an ascidian species complex adapted to  
different thermal conditions**

Atsuko Sato, Takeshi Kawashima, Manabu Fujie, Samantha Hughes, Nori Satoh, Sebastian M  
Shimeld

To whom correspondence should be addressed to: Atsuko Sato (email: [pterobranch@gmail.com](mailto:pterobranch@gmail.com))

This PDF file includes:

Tables: S1-S5

Figs: S1-11

**Supplementary Table S1. Complete list of gene models found in the transcriptome analysis.**  
(see separate PDF file)

**Supplementary Table S2. The complete list of chaperone and other molecules found in the transcriptome analysis.** Raw counts ('B count' and 'A count') were normalized by the RPKM method <sup>46</sup>. Those genes validated by qPCR are highlighted in blue. We did not evaluate genes with less than 10 counts in either species, and others were not validated as we were not able to develop effective qPCR primers. Gene models derive from the KH gene model set <sup>15</sup>. Note some genes are represented by more than one gene model, reflecting splice variants and/or uncertainty in the modeling process.

| Gene name         | KH Gene model         | Gene Model length (bp) | B count | A count | B normalised | A normalised | B/A ratio |
|-------------------|-----------------------|------------------------|---------|---------|--------------|--------------|-----------|
| <i>dnajc4</i>     | KH.C4.524.v1.A.ND1-1  | 827                    | 1       | 7       | 2.57         | 18.60        | 0.14      |
| <i>methuselah</i> | KH.C1.1280.v1.A.ND1-1 | 3642                   | 1       | 4       | 0.58         | 2.41         | 0.24      |
| <i>dnajc12</i>    | KH.C2.472.v1.A.SL1-1  | 635                    | 2       | 6       | 6.70         | 20.77        | 0.32      |
| <i>dnajb9</i>     | KH.C1.914.v1.A.ND1-1  | 1565                   | 11      | 32      | 14.95        | 44.94        | 0.33      |
| <i>rbj</i>        | KH.C2.432.v1.A.ND1-1  | 1039                   | 22      | 48      | 45.03        | 101.53       | 0.44      |
| <i>dnajc13</i>    | KH.C9.314.v1.A.SL1-1  | 7294                   | 8       | 17      | 2.33         | 5.12         | 0.46      |
| <i>dnajc3</i>     | KH.C1.269.v1.A.SL1-1  | 1831                   | 16      | 30      | 18.58        | 36.01        | 0.52      |
| <i>dnajc7</i>     | KH.C9.428.v1.A.ND2-1  | 882                    | 10      | 18      | 24.11        | 44.85        | 0.54      |
| <i>dnajc7</i>     | KH.C9.428.v2.A.ND3-1  | 1950                   | 25      | 44      | 27.26        | 49.59        | 0.55      |
| <i>hspa9b</i>     | KH.C3.429.v1.A.SL2-1  | 2290                   | 237     | 401     | 220.09       | 384.85       | 0.57      |
| <i>hspa9b</i>     | KH.C3.429.v1.A.SL1-1  | 2278                   | 237     | 401     | 221.25       | 386.87       | 0.57      |
| <i>hsp83</i>      | KH.C3.148.v2.C.ND2-1  | 1718                   | 1383    | 2269    | 1711.94      | 2902.61      | 0.59      |
| <i>dnajc7</i>     | KH.C9.428.v3.A.SL1-1  | 2104                   | 30      | 49      | 30.32        | 51.18        | 0.59      |
| <i>hsp83</i>      | KH.C3.148.v1.C.SL1-1  | 2169                   | 1494    | 2417    | 1464.80      | 2449.03      | 0.60      |
| <i>hsp83</i>      | KH.C3.148.v1.C.SL3-1  | 2187                   | 1494    | 2417    | 1452.75      | 2428.87      | 0.60      |
| <i>ubadc1</i>     | KH.L133.5.v1.A.SL3-1  | 1305                   | 17      | 26      | 27.70        | 43.79        | 0.63      |
| <i>ubadc1</i>     | KH.L133.5.v1.A.SL1-1  | 1206                   | 17      | 26      | 29.98        | 47.38        | 0.63      |
| <i>ubadc1</i>     | KH.L133.5.v1.A.ND2-1  | 1388                   | 17      | 26      | 26.05        | 41.17        | 0.63      |
| <i>gng10</i>      | KH.C8.810.v1.A.SL1-1  | 1622                   | 15      | 22      | 19.67        | 29.81        | 0.66      |
| <i>gng10</i>      | KH.C8.810.v1.A.ND2-1  | 1630                   | 15      | 22      | 19.57        | 29.66        | 0.66      |
| <i>gng10</i>      | KH.C8.810.v1.A.SL3-1  | 1625                   | 15      | 22      | 19.63        | 29.75        | 0.66      |
| <i>rbj</i>        | KH.C2.282.v1.A.ND1-1  | 1835                   | 43      | 63      | 49.83        | 75.45        | 0.66      |
| <i>rbj</i>        | KH.C2.282.v2.A.ND1-1  | 1917                   | 43      | 63      | 47.70        | 72.23        | 0.66      |
| <i>dnajc10</i>    | KH.C9.567.v2.A.SL1-1  | 2711                   | 74      | 107     | 58.05        | 86.74        | 0.67      |
| <i>trap1</i>      | KH.C14.318.v1.A.ND1-1 | 2739                   | 64      | 92      | 49.69        | 73.82        | 0.67      |
| <i>bat3</i>       | KH.L22.22.v1.B.SL1-1  | 3638                   | 46      | 62      | 26.89        | 37.45        | 0.72      |
| <i>tcp1zeta</i>   | KH.S1665.1.v1.A.SL1-1 | 1796                   | 87      | 117     | 103.02       | 143.17       | 0.72      |
| <i>dnajc8</i>     | KH.C14.114.v1.A.SL1-1 | 1260                   | 6       | 8       | 10.13        | 13.95        | 0.73      |
| <i>dnajc5</i>     | KH.C2.944.v2.A.SL1-1  | 1682                   | 120     | 158     | 151.72       | 206.45       | 0.73      |
| <i>dnajc5</i>     | KH.C2.944.v1.A.SL1-1  | 1596                   | 120     | 158     | 159.90       | 217.57       | 0.73      |
| <i>tcp1theta</i>  | KH.L153.45.v1.A.SL1-1 | 2043                   | 142     | 181     | 147.81       | 194.71       | 0.76      |

|                           |                          |      |      |      |         |         |      |
|---------------------------|--------------------------|------|------|------|---------|---------|------|
| <i>tcp1theta</i>          | KH.L153.45.v2.A.SL1-1    | 1894 | 142  | 181  | 159.44  | 210.03  | 0.76 |
| <i>tcp1theta</i>          | KH.L153.45.v1.A.ND2-1    | 2051 | 142  | 181  | 147.24  | 193.95  | 0.76 |
| <i>bag1</i>               | KH.C3.610.v2.A.ND1-2     | 2529 | 9    | 11   | 7.57    | 9.56    | 0.79 |
| <i>ubqln</i>              | KH.C4.426.v1.A.SL2-1     | 2283 | 93   | 110  | 86.63   | 105.89  | 0.82 |
| <i>ubqln</i>              | KH.C4.426.v1.A.SL1-1     | 2252 | 93   | 110  | 87.82   | 107.35  | 0.82 |
| <i>grpel</i>              | KH.C8.114.v1.A.SL1-1     | 897  | 39   | 46   | 92.46   | 112.70  | 0.82 |
| <i>timmm44</i>            | KH.C8.96.v1.A.ND2-1      | 1479 | 29   | 34   | 41.70   | 50.52   | 0.83 |
| <i>timmm44</i>            | KH.C8.96.v1.A.SL1-1      | 1468 | 29   | 34   | 42.01   | 50.90   | 0.83 |
| <i>hspa8</i>              | KH.L141.53.v1.A.ND1-1    | 2288 | 3437 | 4018 | 3194.57 | 3859.50 | 0.83 |
| <i>hspa8</i>              | KH.L141.53.v1.A.SL2-1    | 2254 | 3437 | 4017 | 3242.76 | 3916.74 | 0.83 |
| <i>hspa8</i>              | KH.L141.53.v1.A.SL3-1    | 2240 | 3437 | 4017 | 3263.02 | 3941.22 | 0.83 |
| <i>dnajc10</i>            | KH.C9.567.v1.A.ND2-1     | 707  | 18   | 21   | 54.14   | 65.28   | 0.83 |
| <i>hsp60</i>              | KH.C6.85.v1.A.SL1-1      | 2703 | 353  | 409  | 277.73  | 332.55  | 0.84 |
| <i>dnajb11</i>            | KH.C9.96.v1.A.SL2-1      | 1376 | 133  | 149  | 205.55  | 237.98  | 0.86 |
| <i>dnajb11</i>            | KH.C9.96.v1.A.SL1-1      | 1363 | 133  | 149  | 207.51  | 240.25  | 0.86 |
| <i>rbj</i>                | KH.C2.331.v1.A.SL1-1     | 1712 | 26   | 29   | 32.30   | 37.23   | 0.87 |
| <i>rbj</i>                | KH.C2.331.v1.A.SL2-1     | 1715 | 26   | 29   | 32.24   | 37.16   | 0.87 |
| <i>wbscr18</i>            | KH.C7.436.v2.A.SL2-1     | 928  | 63   | 70   | 144.37  | 165.78  | 0.87 |
| <i>wbscr18</i>            | KH.C7.436.v2.A.SL3-1     | 962  | 63   | 70   | 139.27  | 159.92  | 0.87 |
| <i>rbj</i>                | KH.C2.13.v1.A.SL1-1      | 1197 | 28   | 31   | 49.75   | 56.92   | 0.87 |
| <i>wbscr18</i>            | KH.C7.436.v1.A.ND1-1     | 1075 | 64   | 70   | 126.61  | 143.11  | 0.88 |
| <i>hsp90b1</i>            | KH.L61.14.v1.A.SL1-1     | 2970 | 116  | 120  | 83.06   | 88.80   | 0.94 |
| <i>dnajb12/14/dnajc18</i> | KH.C1.303.v1.A.ND1-1     | 2490 | 102  | 99   | 87.11   | 87.38   | 1.00 |
| <i>dnaja1/4</i>           | KH.C3.139.v1.C.SL1-1     | 1948 | 616  | 594  | 672.48  | 670.15  | 1.00 |
| <i>dnaja1/4</i>           | KH.C3.139.v1.C.SL4-1     | 1951 | 616  | 594  | 671.45  | 669.12  | 1.00 |
| <i>hspa5/hsc70-3</i>      | KH.C9.680.v1.A.SL1-1     | 2382 | 124  | 119  | 110.71  | 109.79  | 1.01 |
| <i>dnaja1/4</i>           | KH.C3.139.v2.C.SL2-1     | 1235 | 558  | 534  | 960.85  | 950.28  | 1.01 |
| <i>dnaja1/4</i>           | KH.C3.139.v3.C.ND3-1     | 1110 | 519  | 492  | 994.34  | 974.14  | 1.02 |
| <i>hyou</i>               | KH.C11.193.v1.A.SL1-1    | 3332 | 87   | 80   | 55.53   | 52.77   | 1.05 |
| <i>bag3</i>               | KH.C8.859.v1.A.nonSL1-1  | 957  | 176  | 157  | 391.10  | 360.55  | 1.08 |
| <i>dnaja3</i>             | KH.C14.339.v1.B.ND1-1    | 1924 | 22   | 19   | 24.32   | 21.70   | 1.12 |
| <i>dnajc7</i>             | KH.C9.410.v1.C.ND1-1     | 1508 | 290  | 248  | 408.96  | 361.43  | 1.13 |
| <i>dnajc7</i>             | KH.C9.410.v1.C.nonSL2-1  | 900  | 290  | 248  | 685.24  | 605.60  | 1.13 |
| <i>dnajc6</i>             | KH.C8.356.v2.A.SL1-1     | 4610 | 125  | 106  | 57.66   | 50.53   | 1.14 |
| <i>HSPH/hspa4</i>         | KH.C14.180.v1.A.SL1-1    | 3053 | 504  | 422  | 351.07  | 303.78  | 1.16 |
| <i>HSPH/hspa4</i>         | KH.C14.180.v2.A.ND2-1    | 2884 | 503  | 421  | 370.90  | 320.82  | 1.16 |
| <i>dnajc2</i>             | KH.C1.289.v1.A.ND1-1     | 2065 | 159  | 128  | 163.74  | 136.23  | 1.20 |
| <i>sec63</i>              | KH.S437.4.v1.A.SL1-1     | 2415 | 167  | 132  | 147.06  | 120.13  | 1.22 |
| <i>dnajc6</i>             | KH.C8.356.v1.A.ND4-1     | 4225 | 122  | 96   | 61.41   | 49.94   | 1.23 |
| <i>dnajc6</i>             | KH.C8.356.v1.A.SL3-1     | 3796 | 122  | 96   | 68.35   | 55.58   | 1.23 |
| <i>dnajc6</i>             | KH.C8.356.v1.A.SL2-1     | 3859 | 122  | 96   | 67.23   | 54.67   | 1.23 |
| <i>dnajc11</i>            | KH.C4.798.v1.A.SL1-1     | 2190 | 21   | 16   | 20.39   | 16.06   | 1.27 |
| <i>Magmas</i>             | KH.C2.716.v2.A.ND2-1     | 1101 | 25   | 19   | 48.29   | 37.93   | 1.27 |
| <i>dnajb13</i>            | KH.L4.20.v1.C.SL2-1      | 862  | 4    | 3    | 9.87    | 7.65    | 1.29 |
| <i>hsc20</i>              | KH.C10.111.v1.A.SL1-1    | 1000 | 4    | 3    | 8.51    | 6.59    | 1.29 |
| <i>dnajb13</i>            | KH.L4.20.v1.A.ND1-1      | 1374 | 4    | 3    | 6.19    | 4.80    | 1.29 |
| <i>tcpbeta</i>            | KH.C14.531.v1.A.SL1-1    | 1798 | 132  | 94   | 156.13  | 114.90  | 1.36 |
| <i>tcpeta</i>             | KH.S1300.1.v1.A.nonSL1-1 | 1885 | 95   | 65   | 107.18  | 75.78   | 1.41 |
| <i>dnajc9</i>             | KH.C12.582.v1.C.SL1-1    | 1061 | 3    | 2    | 6.01    | 4.14    | 1.45 |
| <i>tcp1epsilon</i>        | KH.L95.8.v1.A.ND1-1      | 1802 | 229  | 150  | 270.25  | 182.94  | 1.48 |

|                       |                            |             |             |             |                |                |             |
|-----------------------|----------------------------|-------------|-------------|-------------|----------------|----------------|-------------|
| <i>tcp1epsilon</i>    | KH.L95.20.v1.A.ND1-1       | 1839        | 229         | 150         | 264.81         | 179.26         | 1.48        |
| <i>tcp1alpha</i>      | KH.C5.523.v1.A.SL1-1       | 2065        | 228         | 148         | 234.80         | 157.51         | 1.49        |
| <i>tcp1alpha</i>      | KH.L96.2.v1.A.ND2-1        | 1996        | 251         | 161         | 267.42         | 177.27         | 1.51        |
| <i>tcp1alpha</i>      | KH.L96.2.v1.A.SL1-1        | 1992        | 251         | 161         | 267.96         | 177.63         | 1.51        |
| <i>dnajc1</i>         | KH.L112.3.v1.A.ND1-1       | 1689        | 12          | 7           | 15.11          | 9.11           | 1.66        |
| <i>dnajc1</i>         | KH.L112.3.v1.A.SL2-1       | 1657        | 12          | 7           | 15.40          | 9.28           | 1.66        |
| <i>dnajb2/3/6/7/8</i> | KH.C2.518.v1.A.SL1-1       | 1437        | 315         | 178         | 466.17         | 272.23         | 1.71        |
| <i>dnajb2/3/6/7/8</i> | KH.C2.518.v1.A.SL2-1       | 1512        | 316         | 178         | 444.45         | 258.73         | 1.72        |
| <i>danjb1/4/5</i>     | KH.L170.59.v1.A.ND1-1      | 1595        | 1235        | 639         | 1646.63        | 880.48         | 1.87        |
| <i>bag3</i>           | KH.C8.85.v2.A.ND3-2        | 1043        | 256         | 121         | 521.97         | 254.96         | 2.05        |
| <i>bag3</i>           | KH.C8.85.v1.A.SL1-2        | 805         | 280         | 119         | 739.69         | 324.88         | 2.28        |
| HSPB                  | KH.S455.4.v1.A.SL1-1       | 1100        | 72          | 29          | 139.20         | 57.94          | 2.40        |
| <i>dnajc16</i>        | KH.L20.7.v1.A.SL1-1        | 2554        | 11          | 4           | 9.16           | 3.44           | 2.66        |
| <b><i>hsp70</i></b>   | <b>KH.L46.6.v1.A.ND1-1</b> | <b>1768</b> | <b>3433</b> | <b>1130</b> | <b>4129.34</b> | <b>1404.67</b> | <b>2.94</b> |
| <i>bag3</i>           | KH.C8.85.v5.A.ND2-1        | 1605        | 1600        | 478         | 2119.99        | 654.53         | 3.24        |
| <i>bag3</i>           | KH.C8.85.v4.A.SL1-1        | 1468        | 1627        | 478         | 2356.95        | 715.61         | 3.29        |
| SIL (BAP)             | KH.L124.16.v1.A.ND1-1      | 1828        | 31          | 7           | 36.06          | 8.42           | 4.29        |

**Supplementary Table S3. qPCR analysis of prioritized chaperone genes including *dnajc3* and *dnajc10*.** Two independent sets of primers designed on different exons were used for each gene, except where only one functional primer set could be established (*hspa9b* and *hspa8*). AA heat/ BB heat compares type A conspecific crosses with type B conspecific crosses after heat shock at 27°C for 1h. The data show significant differences in *dnajc3*, *tcp1theta*<sup>50</sup> and *trap1*, with marginal effect in *dnajc10* and *hsp83* but not in *dnajc5*, *hsp60*, *hsp70*, *hspa8* and *hsp9b*. AA (heat/cont) shows comparison between heat shocked and control expression levels in type A conspecific crosses; BB (heat/cont) shows comparison between heat shocked and control expression levels in type B conspecific crosses. The data confirmed induction of transcription by heat shock of *hsp60*, *hsp70*, and *hspa8* in at least one of these species. AB heat/ BA heat shows comparison of alternative hybrid crosses (AB; type A eggs and type B sperm. BA; type B eggs and type A sperm). Those not induced by heat, such as *dnajc3*, *dnajc10*, *dnajc5*, *tcp1theta* and *trap1* (and marginally *dnajb9*), show maternal inheritance of the expression level. A positive correlation to thermal tolerance was only observed for *dnajc3* and *dnajc10* (Fig. 2). *P*-value below the Bonferroni-corrected significance threshold of 0.0045 are shown in green, and *P* < 0.01 is considered as marginally significant and shown in blue.

| Target           | Primers | B/A 454<br>reads<br>ratio | AA cont/<br>BB cont | AA heat/<br>BB heat | AA<br>(heat/cont) | BB<br>(heat/cont) | AB heat/<br>BA heat |
|------------------|---------|---------------------------|---------------------|---------------------|-------------------|-------------------|---------------------|
| <i>dnajb9</i>    | 1 + 2   | 0.33                      | 0.0103              | 0.2654              | 0.4767            | 0.4142            | 0.0061              |
| <i>dnajc10</i>   | 1 + 2   | 0.67                      | 0.0067              | 0.0067              | 0.1               | 0.1               | <0.0001             |
| <i>dnajc3</i>    | 1 + 2   | 0.51                      | 2.00E-04            | 2.00E-04            | 0.1297            | 0.1297            | <0.0001             |
| <i>dnajc5</i>    | 1 + 2   | 0.73                      | 0.0029              | 0.4388              | 0.2101            | 0.2562            | 0.0023              |
| <i>hsp60</i>     | 1 + 2   | 0.83                      | 1.00E-04            | 0.0116              | 0.1772            | 0.0016            | 0.2526              |
| <i>hsp70</i>     | 1 + 2   | 2.94                      | 0.4683              | 0.4683              | <0.0001           | <0.0001           | 0.0278              |
| <i>hsp83</i>     | 1 + 2   | 0.59                      | 0.0081              | 0.0081              | 0.013             | 0.013             | 0.8541              |
| <i>hspa8</i>     | 1       | 0.83                      | 0.0882              | 0.0882              | 0.0021            | 0.0021            | 0.8298              |
| <i>hspa9b</i>    | 1       | 0.57                      | 0.0366              | 0.0366              | 0.048             | 0.048             | 0.0066              |
| <i>TCP1theta</i> | 1 + 2   | 0.76                      | <0.0001             | <0.0001             | 0.0331            | 0.0331            | 8.00E-04            |
| <i>trap1</i>     | 1 + 2   | 0.67                      | 1.00E-04            | 1.00E-04            | 0.6431            | 0.6431            | 1.00E-04            |

**Supplementary Table S4. List of primer sequences used for qPCR analysis.**

| Target           | Primer sets          | Sequence     | Target length        |     |
|------------------|----------------------|--------------|----------------------|-----|
| <i>dnajc3</i>    | 1                    | DNAJC3-F3    | AGCAGCAAAGAAGGTCATGC | 106 |
|                  |                      | DNAJC3-R3    | ATTTCCACGTTTAATGCGCC |     |
|                  | 2                    | DNAJC3-F4    | CAGCCTTGCCGGCCACTGTG | 114 |
|                  |                      | DNAJC3-R4    | GGAATCCAGGAAGGCACGAA |     |
| <i>dnajc10</i>   | 1                    | DNAJC10-F1   | CAGGATCCTGATGAAATAAC | 204 |
|                  |                      | DNAJC10-R1   | GCGACAATACTTCCGCAACA |     |
|                  | 2                    | DNAJC10-F2   | GCCCGTGTATGGCATTCTCA | 117 |
|                  |                      | DNAJC10-R2   | ACCCAGCTTGGCTACAAAT  |     |
| <i>hsp83</i>     | 1                    | Hsp90-F5     | GGGTTCTTCAATATCACTC  | 127 |
|                  |                      | Hsp83-5R     | AACCTGGTCTCTTGATTAC  |     |
|                  | 2                    | Hsp83-6F     | ATGAGCTTGATCATCAACAC | 92  |
|                  |                      | Hsp83-6R     | TATCGGATCTTGTCCAAGGC |     |
| <i>hsp60</i>     | 1                    | Hsp60-3F     | AACTTGCAAGTGGTGTGCTG | 111 |
|                  |                      | Hsp60-3R     | CTACTGCAGCTCGTGTGCG  |     |
|                  | 2                    | Hsp60_F5     | CGCTGGCATGGAAGGACAAC | 98  |
|                  |                      | Hsp60_R5     | GTCGTAGCCATAGTCACCTT |     |
| <i>hsp70</i>     | 1                    | Hsp70_F5     | CACTGGCCTTTCAAGGTAGT | 229 |
|                  |                      | Hsp70_R5     | CCAGCCAAGTTCTTATCGAG |     |
|                  | 2                    | Hsp70-F3     | CCATTCGGTTATCGAAGTCC | 237 |
|                  |                      | Hsp70_R4     | ATCCTGGTTGATCCTCCGAC |     |
| <i>trap</i>      | 1                    | trap F2      | CAACTTGAGCAGAGAACTGC | 107 |
|                  |                      | trap R2      | GGTCGCGACGACTTTGATCC |     |
|                  | 2                    | trap1_F5     | TGAACACGAGTTTCAAGCTG | 75  |
|                  |                      | trap1_R5     | TCTAACGCGTCACTCGCATT |     |
| <i>dnajc5</i>    | 1                    | DNAJC5-F1    | AATGAACCTCAACCTCAAGG | 113 |
|                  |                      | DNAJC5-R1    | GTCCTCAGGTTGTCTTCTCC |     |
|                  | 2                    | DNAJC5-F2    | CCCTTGGGCGCATCACCTCC | 121 |
|                  |                      | DNAJC5-R2    | CGACAACATGATTTATGCA  |     |
| <i>tcp1theta</i> | 1                    | TCP1theta_F1 | CGTAGATAACATTCGTGTGA | 139 |
|                  |                      | TCP1theta_R1 | GACAAGTGTATACCGCTACT |     |
|                  | 2                    | TPC1theta_F2 | GGAGAGGGCAGTAGATGACG | 101 |
|                  |                      | TCPtheta_R2  | CTTTTCGCGAGTTCTATCTC |     |
| <i>dnajb9</i>    | 1                    | DNAJB9-F3    | GAGCCAGACGCGGAAGCAA  | 118 |
|                  |                      | DNAJB9-R3    | CCCATATTGTCGTTCAAACC |     |
|                  | 2                    | DNAJB9-F4    | CCGACTTCCAAAGTGACGAC | 90  |
|                  |                      | DNAJB9-R4    | GATGTGAATGGGAACCTTCC |     |
| <i>hspa9b</i>    | 1                    | HSPA9B-F5    | TTATAGCCGTGTACGACCTT | 192 |
| HSPA9B-R5        | GGGCCGCTTGCATCCATGGT |              |                      |     |
| <i>hspa8</i>     | 1                    | HSPA2/8-4F   | CTTCGTGACGCTAAGATGGG | 91  |
| HSPA2/8-4R       | GGAATACGAGTGGAGCCACC |              |                      |     |

**Supplementary Table S5. ER chaperones identified from genomes of various organisms with special focus on marine invertebrates.** All except *M. brevicollis* are animals, and most have planktonic larvae. Accession numbers are given where these exist. In other cases gene models or equivalent identifiers are listed, which can be accessed via the database shown.

| Species                                | Database/<br>Source                                                                                       | <i>dnajc3</i> orthologue                              | <i>dnajc10</i> orthologue                              | <i>dnajb9</i> orthologue                                                                                           |
|----------------------------------------|-----------------------------------------------------------------------------------------------------------|-------------------------------------------------------|--------------------------------------------------------|--------------------------------------------------------------------------------------------------------------------|
| <i>H. sapiens</i><br>(human)           | NCBI                                                                                                      | EAX08959                                              | AAI17300                                               | Q9UBS3                                                                                                             |
| <i>C. intestinalis</i><br>(sea squirt) | Aniseed                                                                                                   | KH.C1.269.                                            | KH.C9.567.                                             | KH.C9.914.                                                                                                         |
| <i>B. floridae</i><br>(amphioxus)      | JGI                                                                                                       | jgi Braf11 122581 <br>jgi Braf11 119688               | jgi Braf11 125408 est<br>Ext_fgenesh2_pg.C<br>_1820034 | jgi Braf11 203558 e_gw.1<br>0.429.1                                                                                |
| <i>S. purpuratus</i><br>(sea urchin)   | Spbase                                                                                                    | SPU_005174                                            | SPU_017259                                             | Not found                                                                                                          |
| <i>S. kowalevskii</i><br>(acorn worm)  | NCBI;<br><a href="http://blast.hgsc.bcm.tmc.edu/">http://blast.hgsc.bcm.tmc.edu/</a>                      | Contig96435*                                          | XP_002740489.1                                         | XP_002730538.1                                                                                                     |
| <i>C. teleta</i><br>(annelid)          | JGI                                                                                                       | jgi Capca1 228061 <br>estExt_fgenesh1_p<br>g.C_660051 | jgi Capca1 228052 e<br>stExt_fgenesh1_pg.<br>C_660035  | jgi Capca1 19566 estExt<br>_fgenesh1_pm.C_50000<br>3<br>(DNAJB1/4/5 and<br>DNAJB9 orthologue)<br>jgi Capca1 225634 |
| <i>L. gigantea</i><br>(limpet)         | JGI                                                                                                       | jgi Lotgi1 151060 fg<br>enesh2_kg.C_sca_<br>80000004  | jgi Lotgi1 171701 <br>jgi Lotgi1 237821                | jgi Lotgi1 235906 <br>jgi Lotgi1 168037                                                                            |
| <i>C. gigas</i><br>(oyster)            | NCBI                                                                                                      | EKC24329                                              | EKC28571                                               | EKC30878.1                                                                                                         |
| <i>C. elegans</i><br>(nematode)        | wormbase                                                                                                  | <i>dnj7</i>                                           | <i>dnj27</i>                                           | Not found                                                                                                          |
| <i>D. melanogaster</i><br>(fruitfly)   | flybase                                                                                                   | P58IPK                                                | Not found                                              | Not found                                                                                                          |
| <i>A. digitifera</i><br>(coral)        | <a href="http://marinegenomics.oist.jp/genomes/gallery">http://marinegenomics.oist.jp/genomes/gallery</a> | aug_v2a.19366.t1*                                     | aug_v2a.21205.t1                                       | aug_v2a.18536.t1                                                                                                   |
| <i>N. vectensis</i><br>(sea anemone)   | JGI                                                                                                       | jgi Nemve1 174406 <br>estExt_gwp.C_304<br>0037        | jgi Nemve1 163820 <br>estExt_gwp.C_4400<br>26          | jgi Nemve1 106836 e_g<br>w.84.88.1                                                                                 |
| <i>T. adhaerens</i>                    | JGI                                                                                                       | jgi Triad1 32828 e_                                   | Not found                                              | jgi Triad1 56372 fgenesh                                                                                           |

|                                                     |                                                                                                 |                                                                                                     |                               |                                  |
|-----------------------------------------------------|-------------------------------------------------------------------------------------------------|-----------------------------------------------------------------------------------------------------|-------------------------------|----------------------------------|
| <b>(placozoan)</b>                                  |                                                                                                 | gw1.26.21.1                                                                                         | <a href="#">Triad1 60480?</a> | TA2_pg.C_scaffold_5000266        |
| <b><i>M. leidy</i><br/>(ctenophore)</b>             | <a href="http://research.nhgri.nih.gov/mnemiosis/">http://research.nhgri.nih.gov/mnemiosis/</a> | ML06971a                                                                                            | ML01344a                      | ML07989a<br>ML37595a<br>ML01344a |
| <b>A.<br/><i>queenslandica</i><br/>(sponge)</b>     | NCBI                                                                                            | XP_003390240.1<br>XP_003391066.1<br>XP_003389230.1                                                  | Not found                     | Not found                        |
| <b><i>M. brevicollis</i><br/>(choanoflagellate)</b> | JGI                                                                                             | jgi Monbr1 6406 <br>jgi Monbr1 15161 <br>jgi Monbr1 18047 <br>jgi Monbr1 18048 <br>jgi Monbr1 20049 | jgi Monbr1 21911              | Not found<br>jgi Monbr1 22976?   |

\*Only whole genome contig and/or incomplete gene prediction available. Orthology of hit verified by reciprocal BLAST.



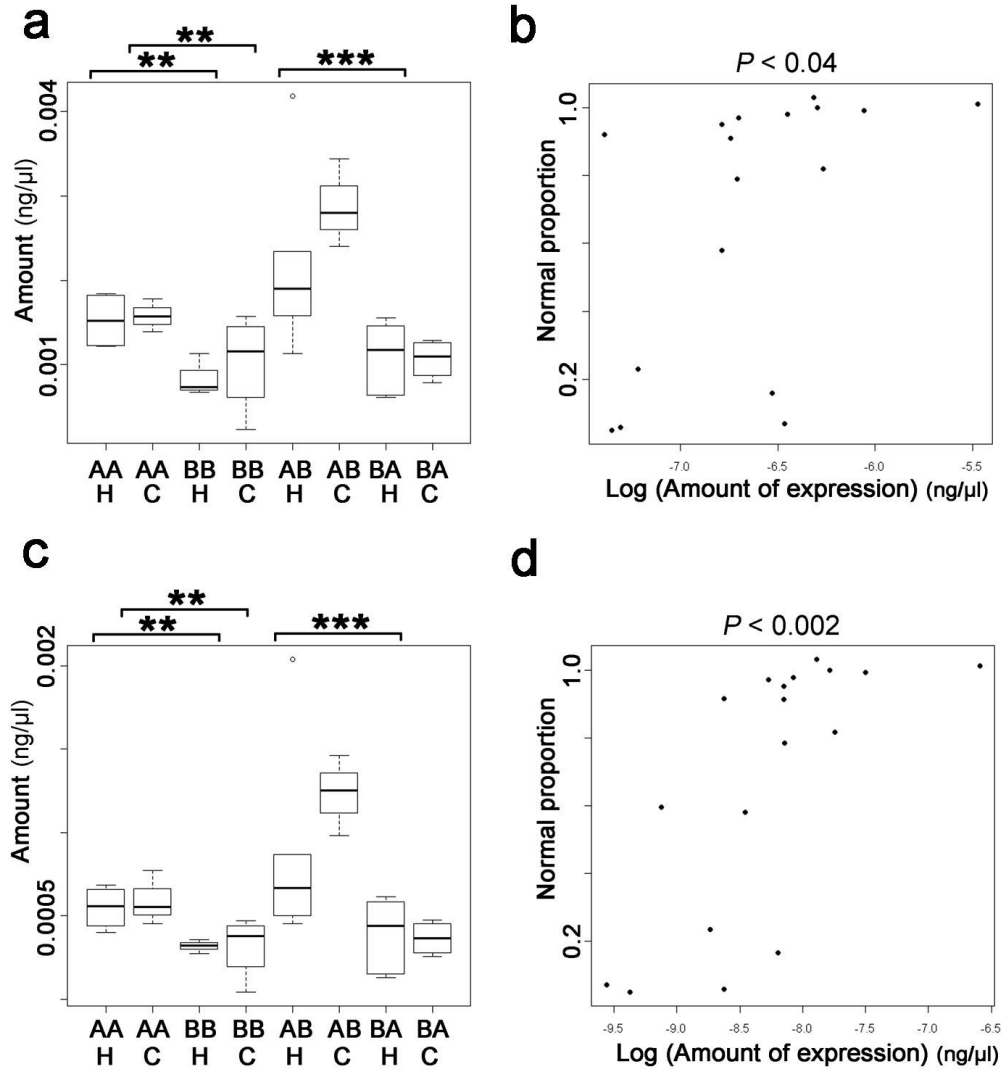

**Supplementary Fig. 1. Comparison of expression levels of *dnajc3*.** **a, b**, show results from primer set 1, whereas **c, d** show primer set 2. **a, c**, Quantification of *dnajc3* expression levels by qPCR in control (C) or heat shocked (H: 27°C for 1h at neurula stage as in Fig. 1a) embryos. Heat shock did not significantly affect the expression of *dnajc3*, however expression in type A (AA) was significantly higher than in type B (BB) ( $P = 0.002$ ). Reciprocal hybridization (AB/BA) showed strong correlation to the maternal genotype ( $P < 0.0001$ ). Significances are shown by asterisks: \*\* $P < 0.01$ ; \*\*\* $P < 0.001$ . **b, d**, Correlation between the amount of *dnajc3* transcripts and Normal proportion after heat shock in individual crosses. Analysis of Variance (ANOVA) rejected the null hypothesis and supported linear correlation of the amount of *dnajc3* transcripts and normal proportion ( $P < 0.04$  for primer sets 1 and  $P < 0.002$  for primer sets 2).

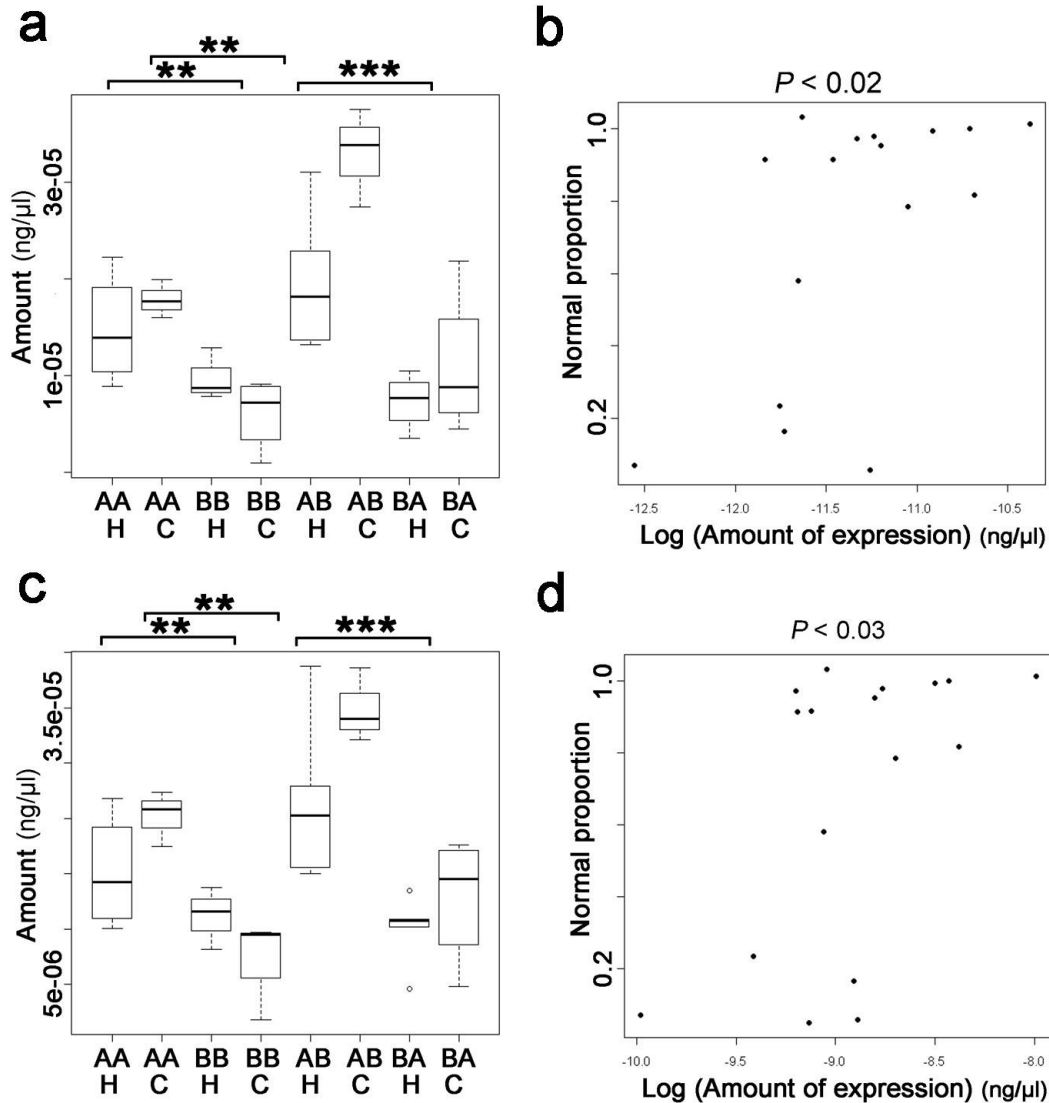

**Supplementary Fig. 2. Comparison of expression levels of *dnajc10*.** **a, b**, show results from primer set 1, whereas **c, d** show primer set 2. **a, c**, Quantification of *dnajc10* expression levels by qPCR in control (C) or heat shocked (H: 27°C for 1h at neurula stage as in Fig. 1a) embryos. Heat shock did not significantly affect the expression of *dnajc10*, and expression in type A (AA) under control condition was significantly higher than in type B (BB) ( $P = 0.0067$ ). Reciprocal hybridization (AB/BA) suggested this was linked to the maternal genotype ( $P \ll 0.0001$ ). Significances are shown by asterisks: \*\*  $P < 0.01$ ; \*\*\*  $P < 0.001$ . **b, d**, Correlation between the amount of *dnajc10* transcripts and normal proportion after heat shock in individual crosses. Analysis of Variance (ANOVA) supports linear correlation of the amount of *dnajc10* transcripts and Normal proportion ( $P = 0.0197$  for primer set 1 and  $P = 0.02665$  for primer set 2).

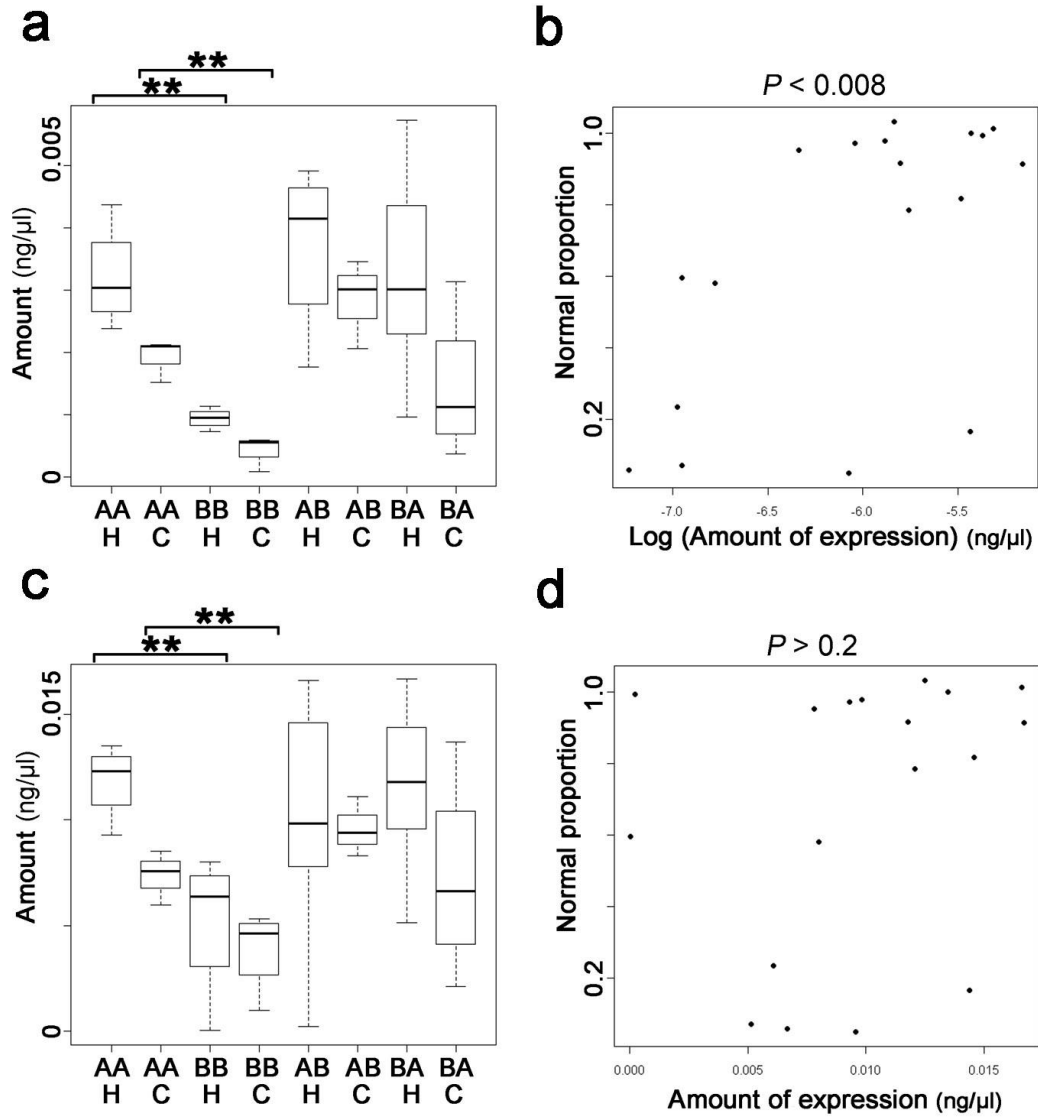

**Supplementary Fig. 3. Comparison of expression levels of *hspa83*.** **a, b,** show results from primer set 1, whereas **c, d** show primer set 2. **a, c,** Quantification of *hspa83* expression levels by qPCR in control (C) or heat shocked (H: 27°C for 1h at neurula stage as in Fig. 1a) embryos. Heat shock did not significantly affect the expression of *hspa83* ( $P = 0.013$ ), but expression in type A (AA) was significantly higher than in type B (BB) ( $P = 0.0081$ ). However, reciprocal hybridization (AB/BA) did not suggest this was linked to the maternal genotype ( $P > 0.85$ ). Significances are shown by asterisks: \*\*  $P < 0.01$ . **b, d,** Correlation between the amount of *hspa83* transcripts and normal proportion after heat shock in individual crosses. Analysis of Variance (ANOVA) did not support linear correlation of the amount of *hspa83* transcripts and Normal proportion ( $P < 0.008$  for primer set 1; for primer set 2  $P > 0.25$ ).

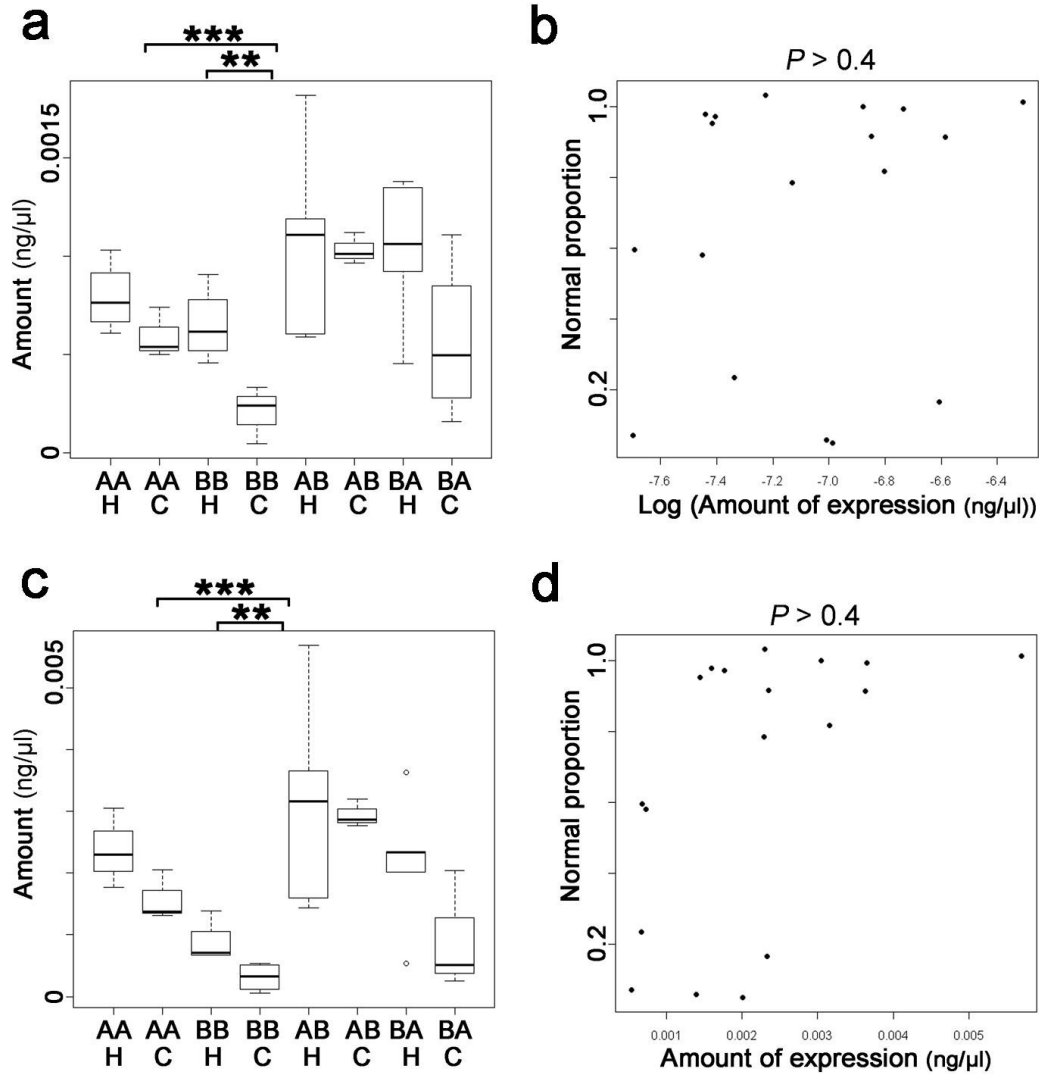

**Supplementary Fig. 4. Comparison of expression levels of *hsp60*.** **a, b**, show results from primer set 1, whereas **c, d** show primer set 2. **a, c**, Quantification of *hsp60* expression levels by qPCR in control (C) or heat shocked (H: 27°C for 1h at neurula stage as in Fig. 1a) embryos. Heat shock significantly affected the expression of *hsp60* only in type B (BB). Comparisons of expression in type A (AA) and in type B (BB) showed significant differences under control condition ( $P = 0.001$ ). However, reciprocal hybridization (AB/BA) did not suggest this was linked to the maternal genotype ( $P = 0.2526$ ). Significances are shown by asterisks: \*\*  $P < 0.01$ ; \*\*\* $P < 0.001$ . **b, d**, Correlation between the amount of *hsp60* transcripts and Normal proportion after heat shock in individual crosses. Analysis of Variance (ANOVA) did not support linear correlation of the amount of *hsp60* transcripts and normal proportion ( $P > 0.42$  for both primer sets 1 and 2).

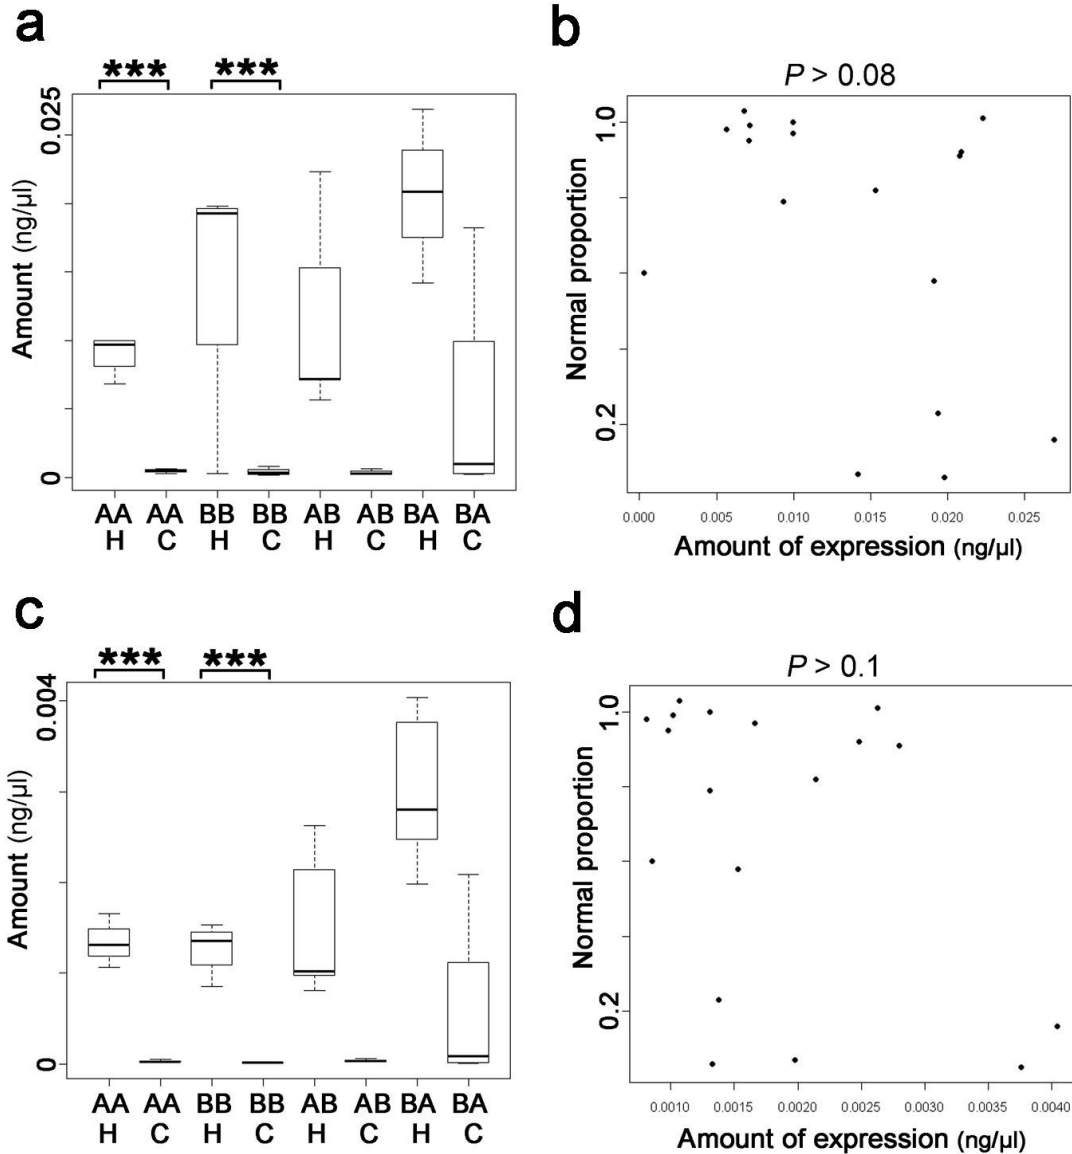

**Supplementary Fig. 5. Comparison of expression levels of *hsp70*.** **a, b,** show results from primer set 1, whereas **c, d** show primer set 2. **a, c,** Quantification of *hsp70* expression levels by qPCR in control (C) or heat shocked (H: 27°C for 1h at neurula stage as in Fig. 1a) embryos. Heat shock significantly affected the expression of *hsp70* in both types A and B ( $P \ll 0.0001$ ). Reciprocal hybridization (AB/BA) did not show its link to the maternal genotype ( $P > 0.02$ ), but the level of expression was negatively correlated to thermal tolerance of these hybrid types. Significances are shown by asterisks: \*\*\* $P < 0.001$ . **b, d,** Correlation between the amount of *hsp70* transcripts and normal proportion after heat shock in individual crosses. Analysis of Variance (ANOVA) did not support linear correlation of the amount of *hsp70* transcripts and Normal proportion ( $P = 0.08933$  for primer set 1 and  $P = 0.103$  for primer set 2).

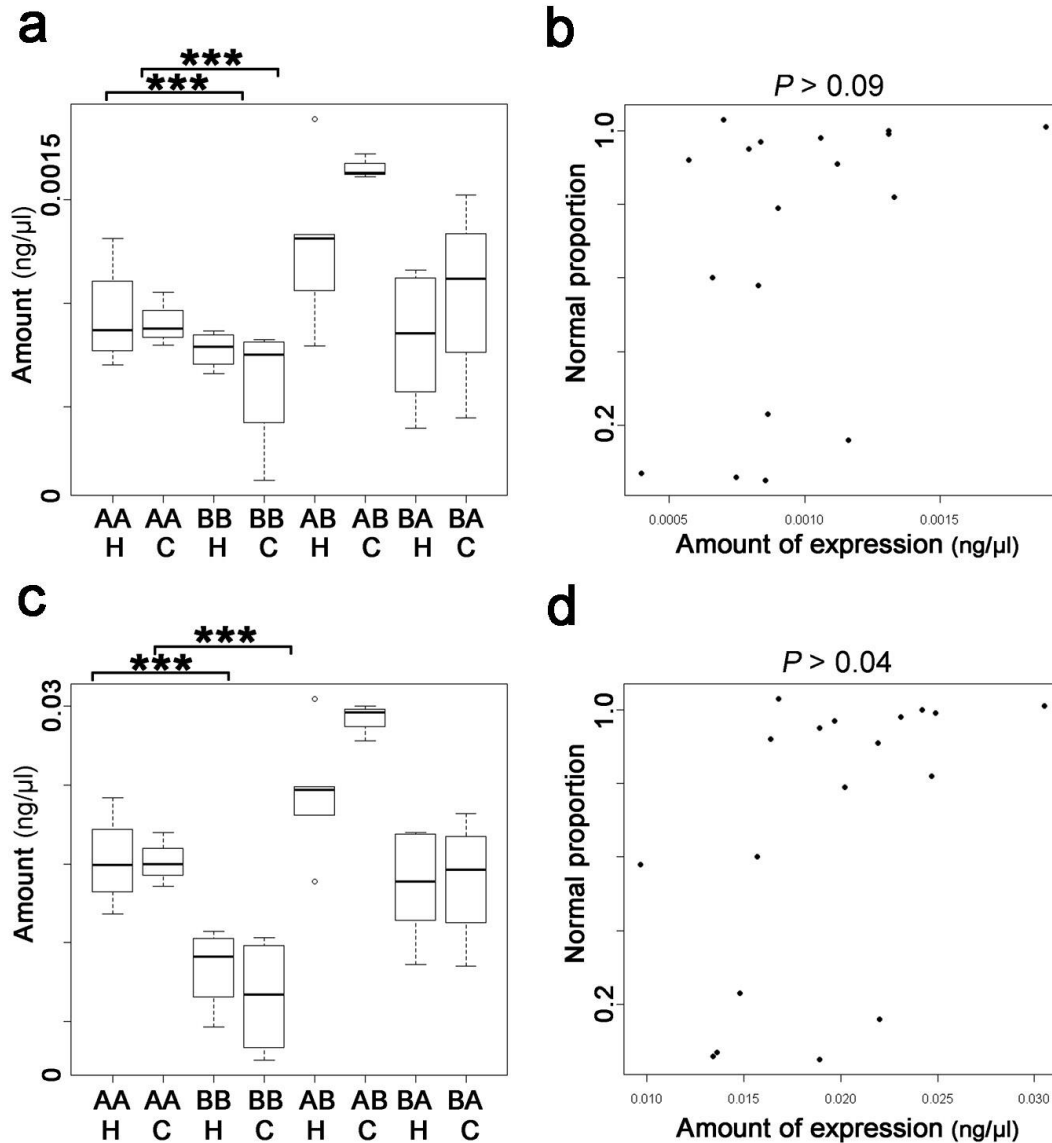

**Supplementary Fig. 6. Comparison of expression levels of *trap1*.** **a, b**, show results from primer set 1, whereas **c, d** show primer set 2. **a, c**, Quantification of *trap1* expression levels by qPCR in control (C) or heat shocked (H: 27°C for 1h at neurula stage as in Fig. 1a) embryos. Heat shock did not significantly affect the expression of *trap1* ( $P = 0.6431$ ), but expression in type A (AA) was significantly higher than in type B (BB) ( $P \ll 0.0001$ ). Reciprocal hybridization (AB/BA) also showed this was linked to the maternal genotype ( $P \ll 0.0001$ ). Significances are shown by asterisks: \*\*\* $P < 0.001$ . **b, d**, Correlation between the amount of *trap1* transcripts and normal proportion after heat shock in individual crosses. Analysis of Variance (ANOVA) did not supports linear correlation of the amount of *trap1* transcripts and Normal proportion ( $P = 0.09315$  for primer set 1 and  $P = 0.046$  for primer set 2).

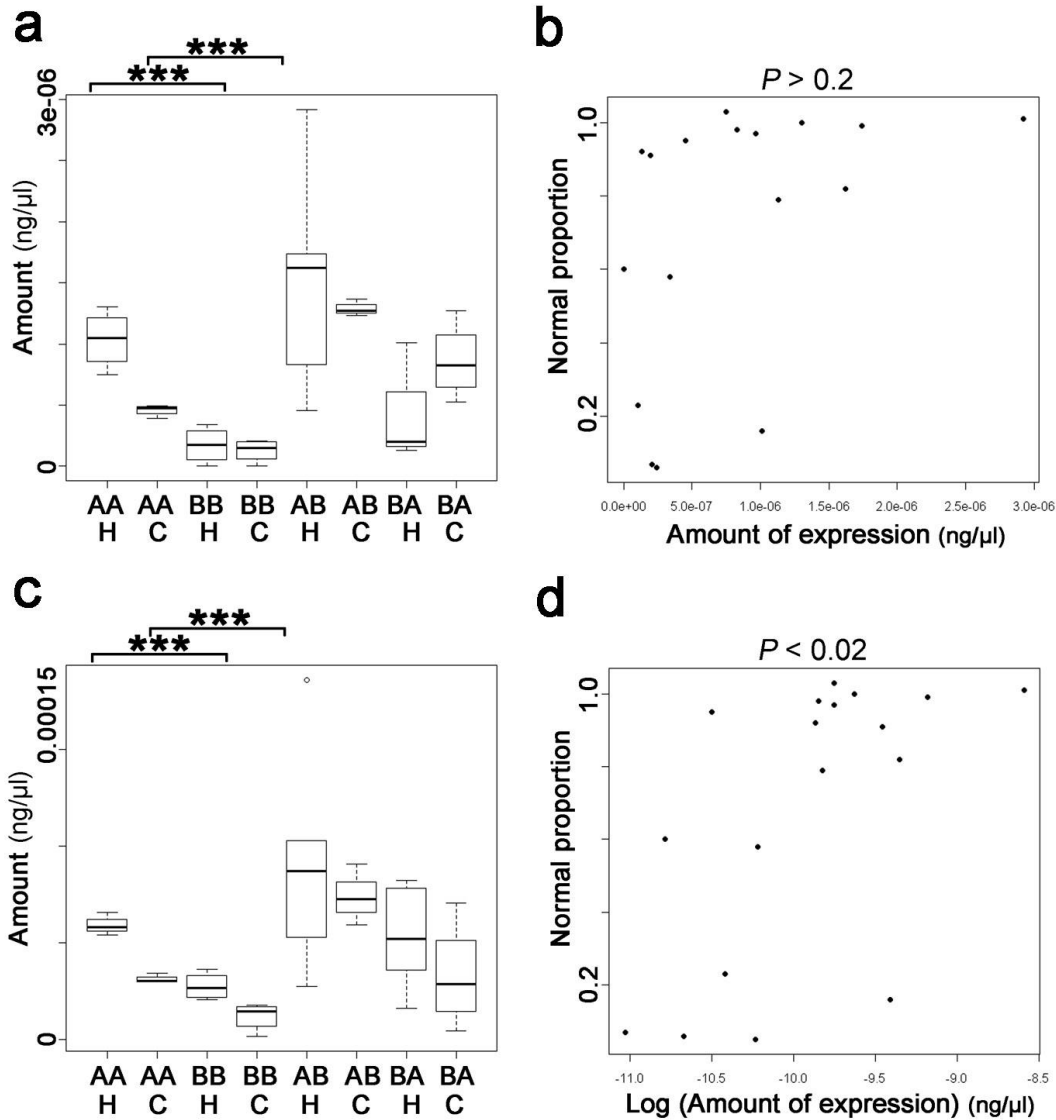

**Supplementary Fig. 7. Comparison of expression levels of *tcp1theta*.** **a, b**, show results from primer set 1, whereas **c, d** show primer set 2. **a, c**, Quantification of *trap1* expression levels by qPCR in control (C) or heat shocked (H: 27°C for 1h at neurula stage as in Fig. 1a) embryos. Heat shock did not significantly affect the expression of *TCP1theta* ( $P = 0.0331$ ), but expression in type A (AA) was significantly higher than in type B (BB) ( $P \ll 0.0001$ ). Reciprocal hybridization (AB/BA) also suggested this was linked to the maternal genotype ( $P = 0.0008$ ). Significances are shown by asterisks: \*\*\* $P < 0.001$ . **b, d**, Correlation between the amount of *trap1* transcripts and Normal proportion after heat shock in individual crosses. Analysis of Variance (ANOVA) did not supports linear correlation of the amount of *tcp1theta* transcripts and normal proportion ( $P=0.286$  for primer set 1 and  $P=0.6196$  for primer set 2).

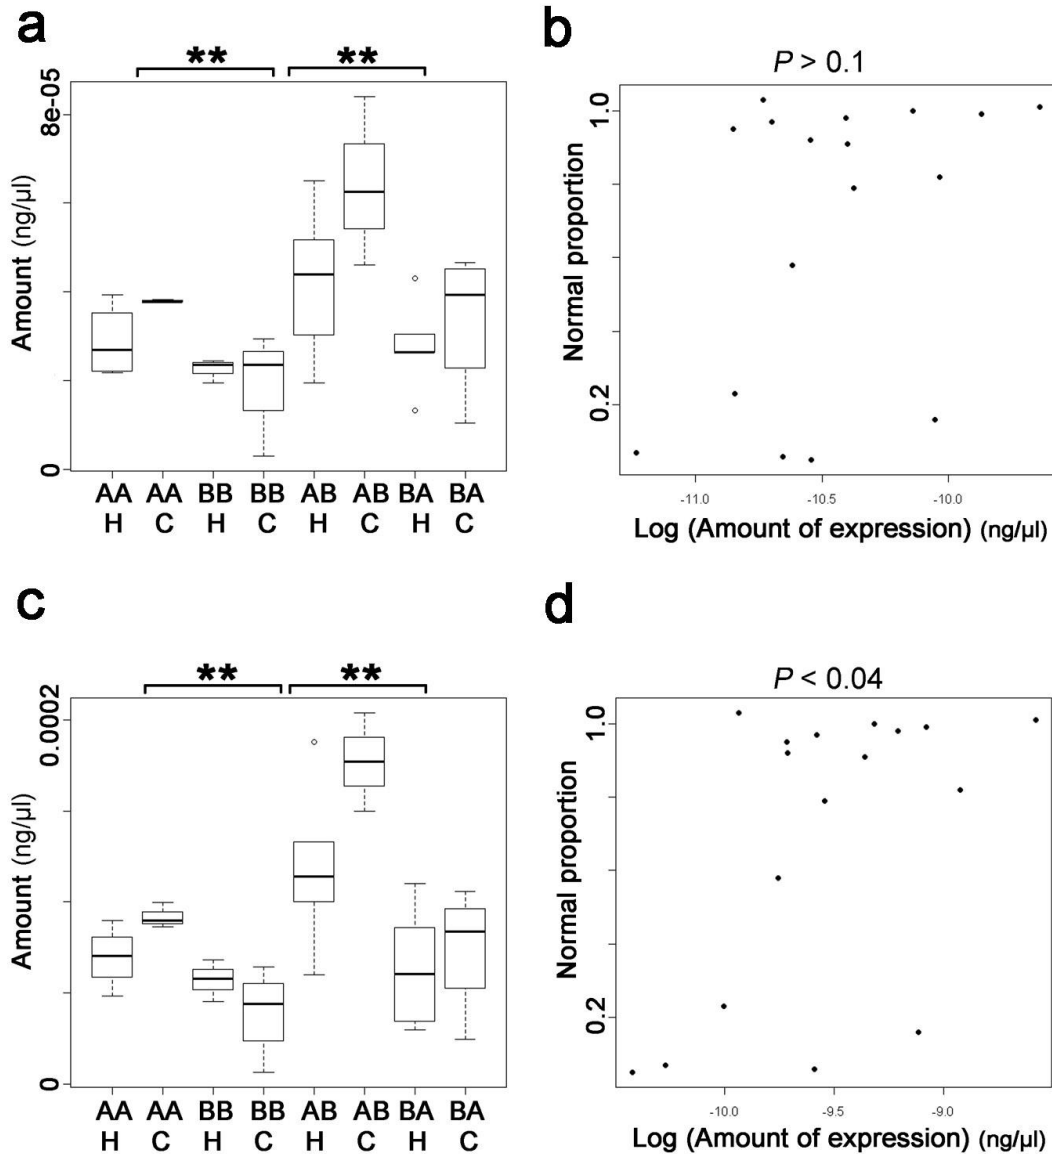

**Supplementary Fig. 8. Comparison of expression levels of *dnajc5*.** **a, b**, show results from primer set 1, whereas **c, d** show primer set 2. **a, c**, Quantification of *dnajc5* expression levels by qPCR in control (C) or heat shocked (H: 27°C for 1h at neurula stage as in Fig. 1a) embryos. Heat shock did not significantly affect the expression of *dnajc5* ( $P > 0.2$ ), and type A (AA) was significantly higher than in type B (BB) in the expression levels only under control condition ( $P = 0.0029$ ). Reciprocal hybridization (AB/BA) did not show this was linked to the maternal genotype ( $P = 0.0023$ ). Significances are shown by asterisks: \*\* $P < 0.01$ . **b, d**, Correlation between the amount of *dnajc5* transcripts and Normal proportion after heat shock in individual crosses. Analysis of Variance (ANOVA) did not supports linear correlation of the amount of *dnajc5* transcripts and normal proportion ( $P = 0.1197$  for primer set 1 and  $P = 0.03274$  for primer set 2).



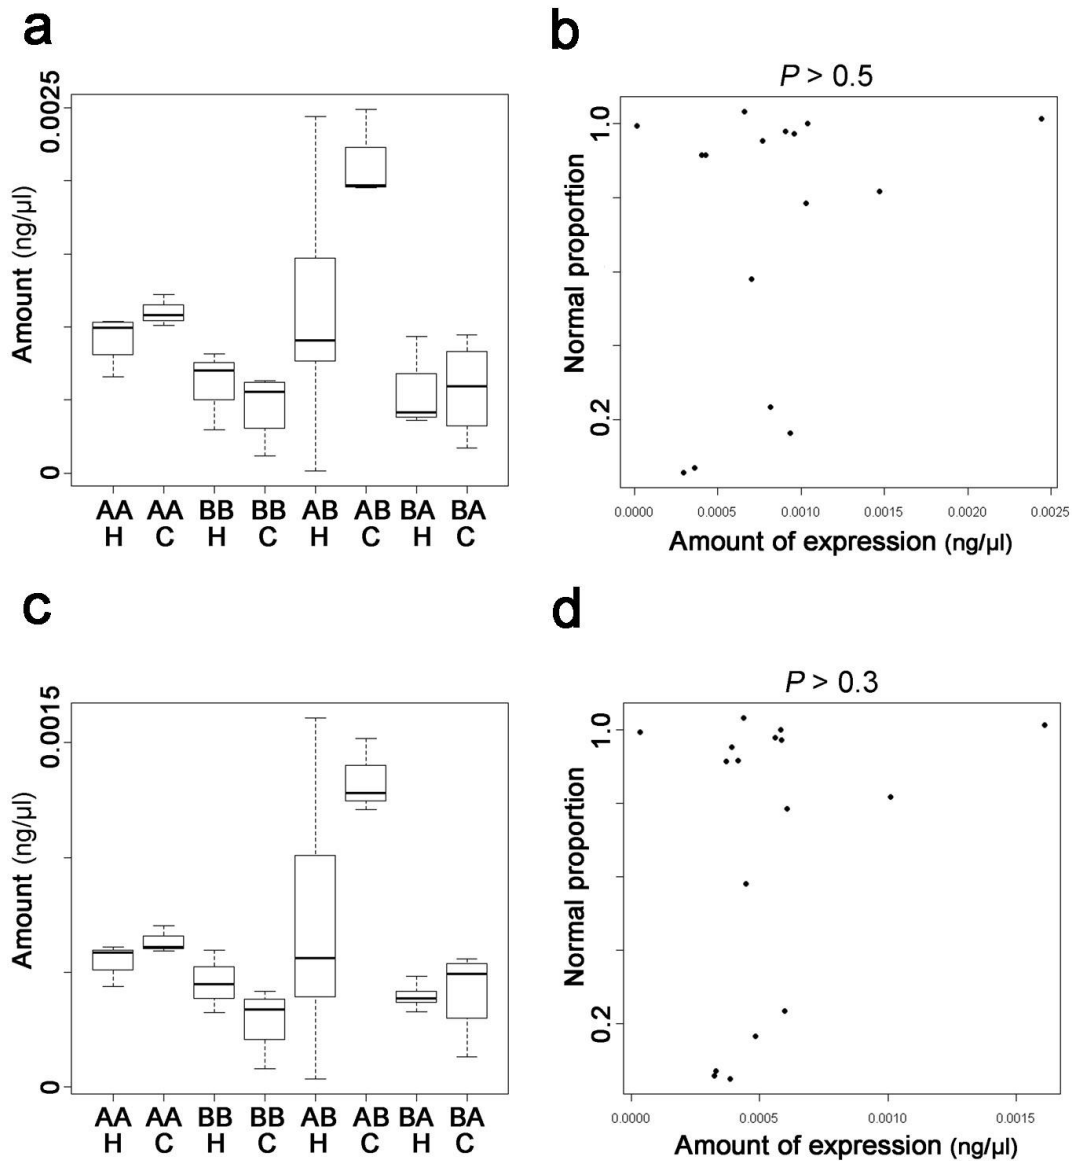

**Supplementary Fig. 9. Comparison of expression levels of *dnajb9*.** **a, b**, show results from primer set 1, whereas **c, d** show primer set 2. **a, c**, Quantification of *dnajb9* expression levels by qPCR in control (C) or heat shocked (H: 27°C for 1h at neurula stage as in Fig. 1a) embryos. Heat shock did not significantly affect the expression of *dnajb9* ( $P < 0.4$ ), and expression in type A (AA) did not show significant difference from expression in type B (BB). However, reciprocal hybridization (AB/BA) suggests this was linked to the maternal genotype ( $P = 0.0061$ ). **b, d**, Correlation between the amount of *dnajb9* transcripts and Normal proportion after heat shock in individual crosses. Analysis of Variance (ANOVA) did not support linear correlation of the amount of *dnajb9* transcripts and normal proportion ( $P = 0.554$  for primer set 1, and  $P = 0.335$  for primer set 2).

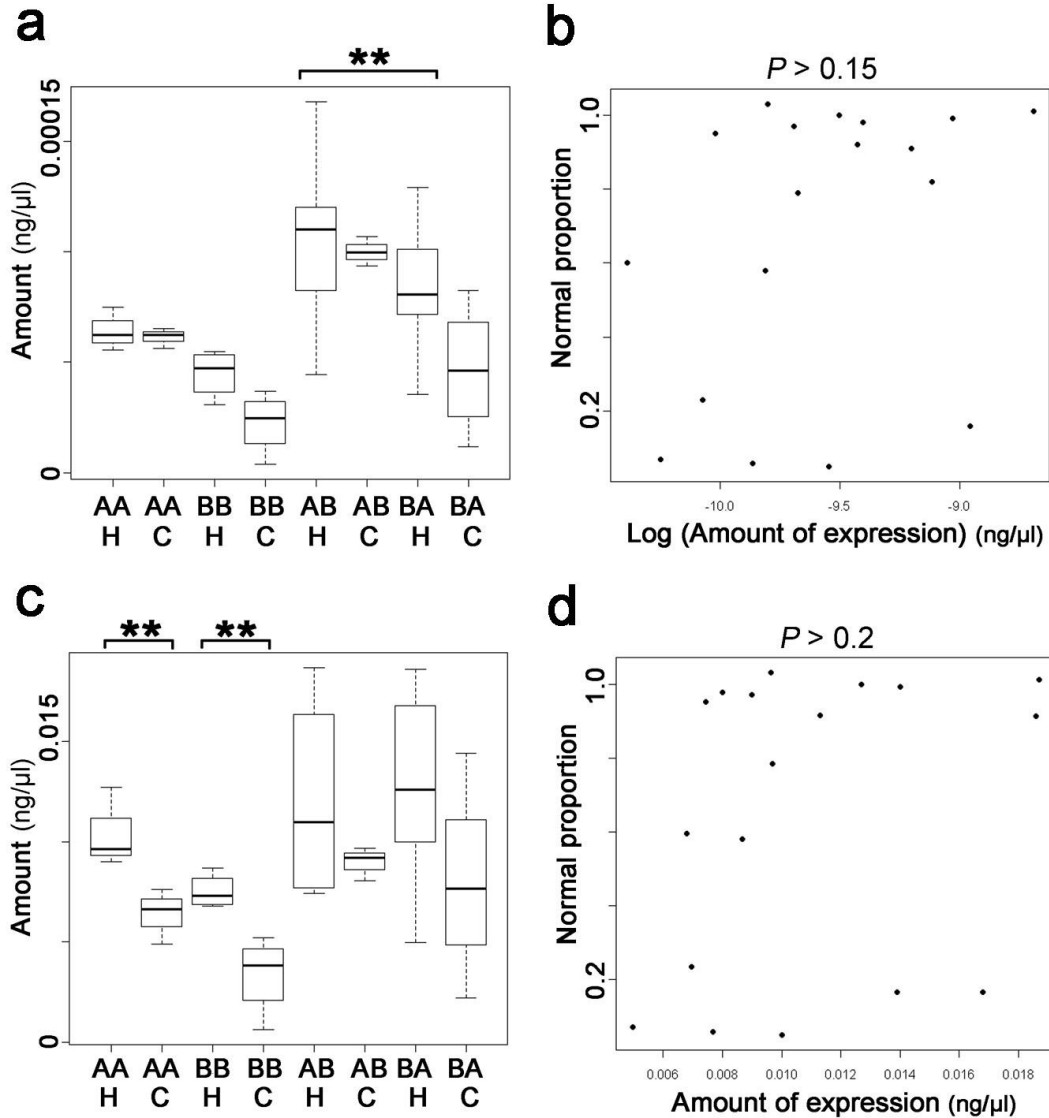

**Supplementary Fig. 10. Comparison of expression levels of *hspa9b* and *hspa8*.** **a, b,** show results from *hspa9b*, whereas **c, d** show *hspa8*. **a, c,** Quantification of each gene expression levels by qPCR in control (C) or heat shocked (H: 27°C for 1h at neurula stage as in Fig. 1a) embryos. Expression in type A (AA) did not show significant difference from expression in type B (BB) in both genes (for *hspa9b*  $P = 0.0366$ , for *hspa8*  $P = 0.0882$ ). Heat shock significantly affected the expression of *hspa8* ( $P = 0.0021$ ) but not in *hspa9b* ( $P = 0.048$ ). Reciprocal hybridization (AB/BA) marginally supported this was linked to the maternal genotype in *hspa9b* ( $P = 0.0066$ ) but not for *hspa8* ( $P = 0.8298$ ). Significances are shown by asterisks: \*\* $P < 0.01$ . **b, d,** Correlation between the amount of each gene transcripts and Normal proportion after heat shock in individual crosses. Analysis of Variance (ANOVA) did not support linear correlation of the amount of transcripts and normal proportion in neither of these genes ( $P=0.1575$  for *hspa9b* and  $P=0.2384$  for *hspa8*).

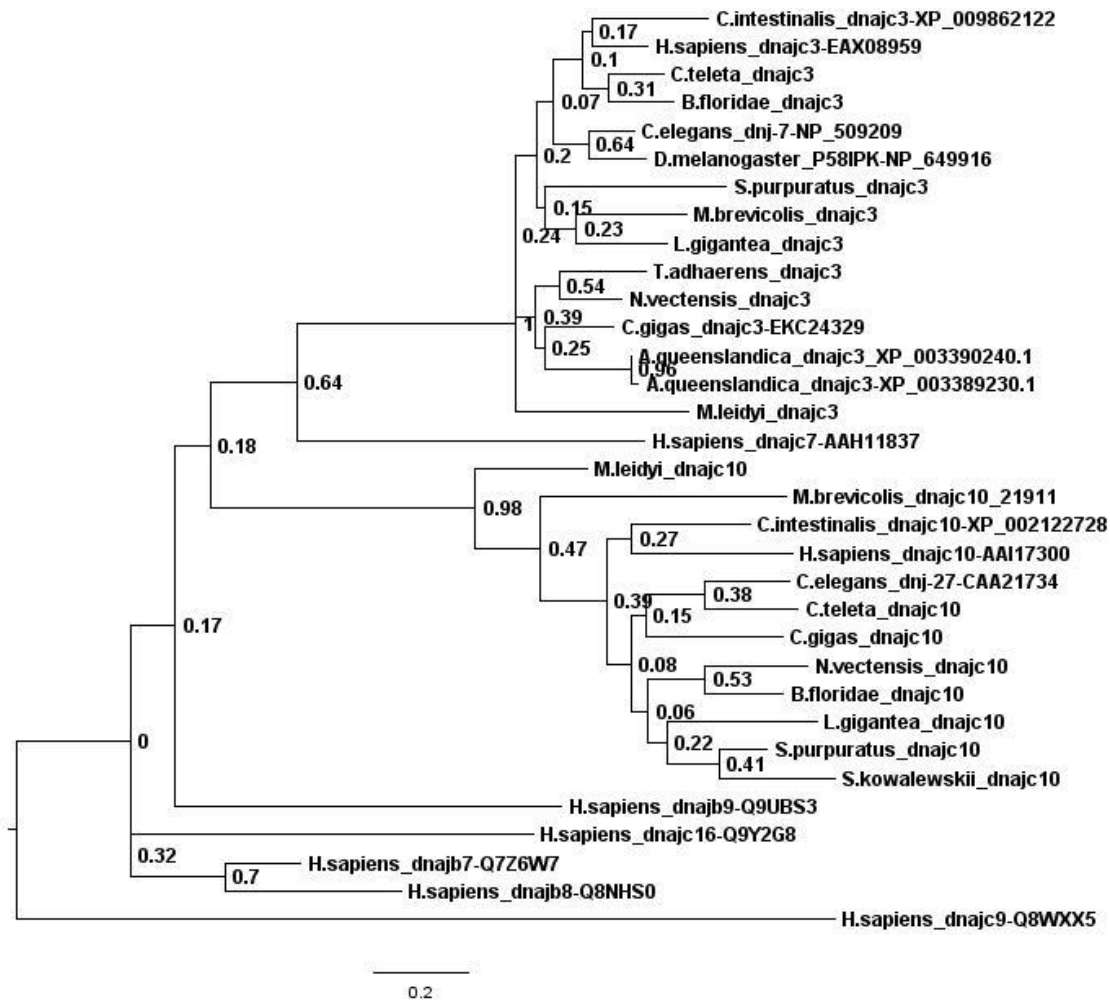

**Supplementary Fig. 11. Maximum Likelihood analysis of *dnajc3* and *dnajc10* genes.** Species used for the tree are as follows: *Drosophila melanogaster*, *Caenorhabditis elegans*, *Homo sapiens*, *Ciona intestinalis*, *Branchiostoma floridae* (amphioxus), *Strongylocentrotus purpuratus* (sea urchin), *Saccoglossus kowalevskii* (acorn worm), *Lottia gigantea* (mollusc), *Crassostrea gigas* (mollusc), *Capitella teleta* (annelid), *Nematostella vectensis* (anemone), *Mnemiopsis leidyi* (ctenophore), *Amphimedon queenslandica* (sponge), *Monosiga brevicolis* (choanoflagellate). Accession numbers are given in the figure for outgroup sequences and sequences from model species, for other sequence sources please refer to Supplementary Table S7.
